# Supplementary material
Source: PubMed Central journal article supplement (PMC10331620)

## Supplemental Online Content

Ferrandino RM, Chen S, Kappauf C, et al. Performance of liquid biopsy for diagnosis and surveillance of human papillomavirus–associated oropharyngeal cancer. *JAMA Otolaryngol Head Neck Surg*. Published online July 9, 2023. doi:10.1001/jamaoto.2023.1937

**eFigure 1.** TTMV-HPV DNA tests performed per patient (A) and timing (B) of surveillance testing for Surveillance cohort

**eFigure 2.** Clinical course of a patient with positive TTMV-HPV DNA score preceding a positive biopsy

This supplemental material has been provided by the authors to give readers additional information about their work.

**eFigure 1.** TTMV-HPV DNA tests performed per patient (A) and timing (B) of surveillance testing for Surveillance cohort.

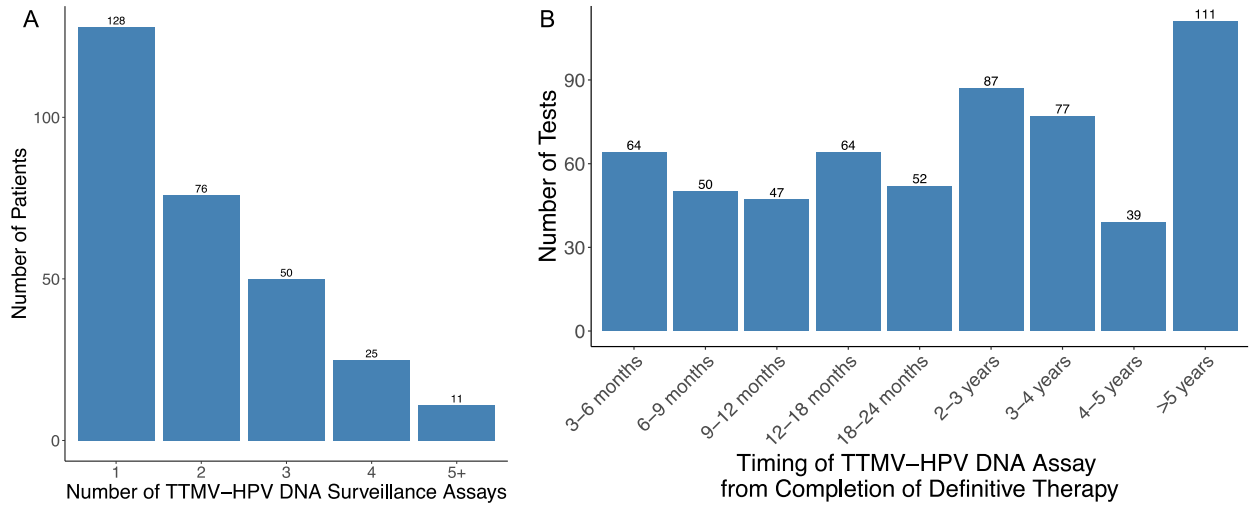

**eFigure 2.** Clinical course of a patient with positive TTMV-HPV DNA score preceding a positive biopsy.

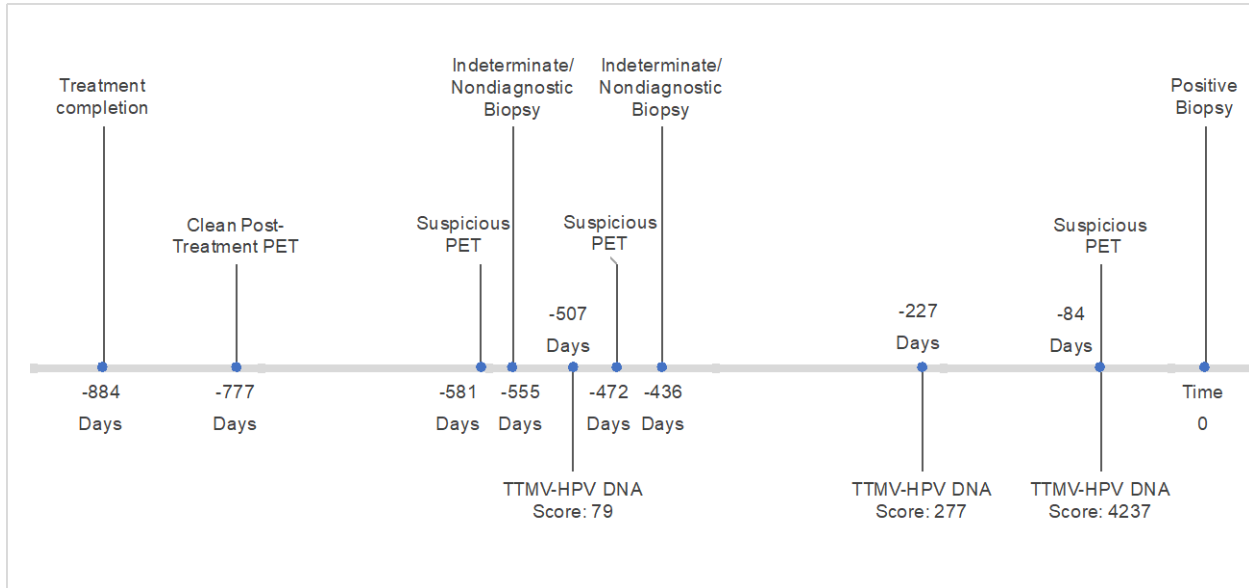

Supplement: jamaotolaryngolheadnecksurg-e231937-s001.pdf [file jamaotolaryngolheadnecksurg-e231937-s001.pdf]
