# Supplementary material
Source: PubMed Central journal article supplement (PMC10331620)
Supplement: jamaotolaryngolheadnecksurg-e231937-s002.pdf [file jamaotolaryngolheadnecksurg-e231937-s002.pdf]

## Data Sharing Statement

Ferrandino. Performance of Liquid Biopsy for Diagnosis and Surveillance of Human Papillomavirus–Associated Oropharyngeal Cancer. *JAMA Otolaryngol Head Neck Surg*. Published July 09, 2023. doi:10.1001/jamaoto.2023.1937

### Data

**Data available:** No
